# Supplementary material
Source: Springer Nature journal article supplement (https://www.springerprofessional.de/resource/supplementary/13174_2012_1_MOESM1_ESM.pdf/10784722)

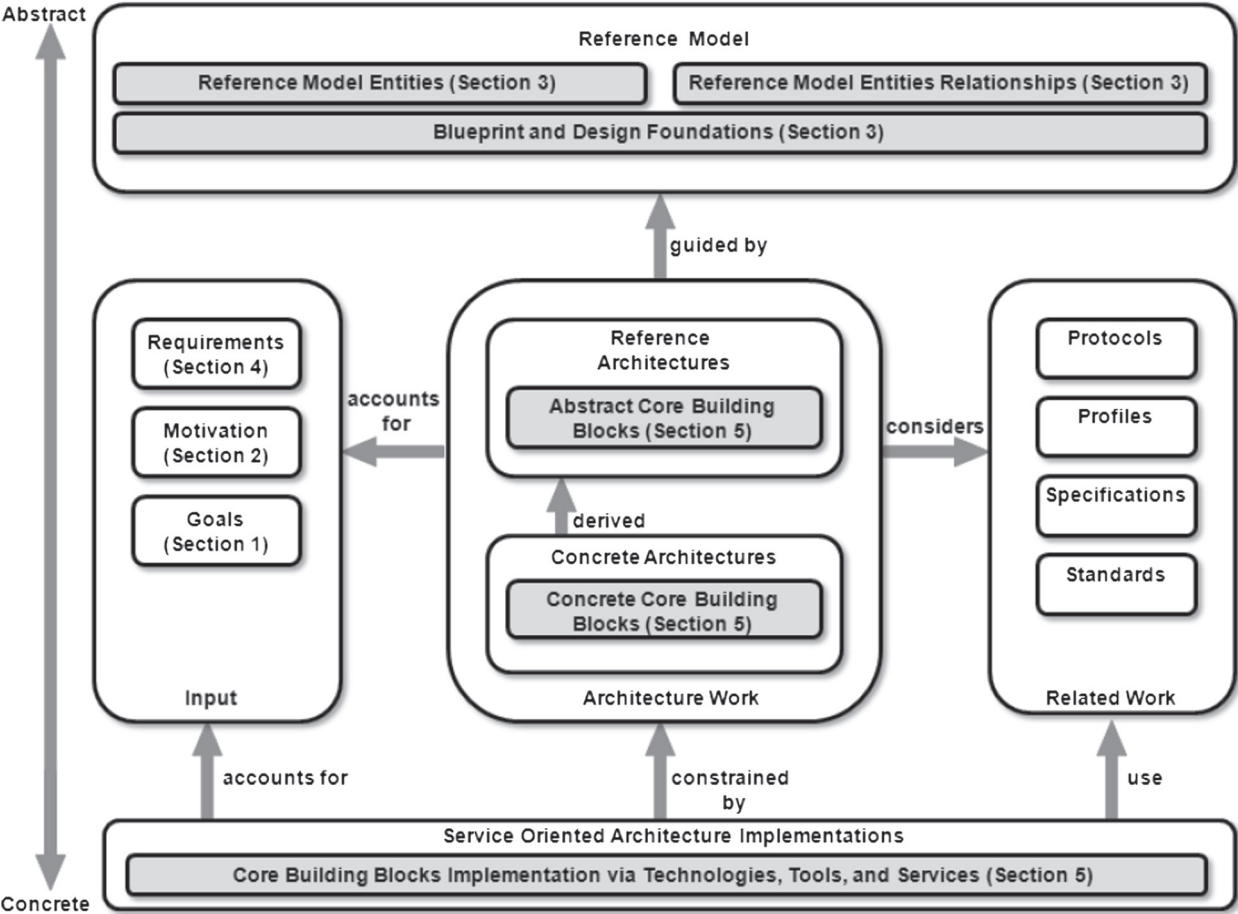

Supplement: MOESM1 [file 10784722]
